# Supplementary material for: Prevalence of intestinal parasitic infection and associated risk factors among village health volunteers in rural communities of southern Thailand
Source: Springer Nature journal article supplement (doi:10.1186/s12889-017-4486-2), 2017-06-09
Supplement: MOESM1 [file 12353616]

# Additional file 1: Questionnaire

## Part 1: Demographic and socioeconomic data

1. Code no.....

2. Sex  1. Male  2. Female

3. Age ..... Years

4. Sub-district  1. Na Reng  2. Nobphitam  
 3. Karo  4. Krungching

5. Religion  1. Buddhism  2. Christian  
 3. Islam  4. Other.....

6. Marital status  1. Single  2. Married  
 3. Widowed  4. Divorced

7. What is the highest level of education you have completed?

- 1. Primary school
- 2. Secondary school
- 3. High vocational/college certificate
- 4. Bachelor's degree
- 5. Higher than bachelor's degree

8. Occupation  1. Farmer  2. Employee  
 3. Government officer  4. Merchant  
 5. Housewife  6. Unemployed  
 7. Other.....

9. Family income (per month)

- Less than 10,000 Baht  10,001-20,000 Baht
- 20,001-30,000 Baht  30,001-40,000 Baht
- Over 40,000 Baht

10. Do you have pets at home? Please specify

- 1. Dog(s)
- 2. Cat(s)
- 3. Other.....
- 4. I don't have any pets at home.

**Part 2: Information on possible risk factors**

- 1) Do you wear shoes when going outside the house?
  - 1. Never/seldom
  - 2. Regularly
  
- 2) Do you wear boots for farm works?
  - 1. Never/seldom
  - 2. Regularly
  
- 3) You always drink water which is.....
  - 1. Not boiled or filtered
  - 2. Boiled
  - 3. Filtered
  - 4. Purified by.....
  
- 4) In a week, do you contact with domestic animals?
  - 1. Never/seldom
  - 2. Regularly
  
- 5) Do you wash hands after touching animals?
  - 1. Never/seldom
  - 2. Regularly
  
- 6) Do you practice open-field defecation?
  - 1. Never/seldom
  - 2. Regularly
  
- 7) Do you wash hands before meal?
  - 1. Never/seldom
  - 2. Regularly
  
- 8) Do you wash hands after defecation?
  - 1. Never/seldom
  - 2. Regularly

☺Thank you for your participation☺
